# Supplementary material for: Machine learning models in predicting high malignant potential in gastrointestinal stromal tumors: a systematic review and meta-analysis
Source: Research Square preprint supplement (doi:10.21203/rs.3.rs-5382250/v1), 2024-12-19
Supplement: Supplementary file 1 [file d1fc44617d0d7ac12f450695.docx]

**Supplementary Information**

List of Contents

Supplementary file 1: Search strategy

Supplementary file 2: Quality evaluation criteria of included literatures

Supplementary file 3: Characteristics of the included studies

Supplementary file 4: Risk of bias assessment of the included studies

**Supplementary file 1. Search strategy in selective databases.**

| Database | Search Term | Results |
| --- | --- | --- |
| PubMed | #1: "gastrointestinal stromal tumors"[MeSH Terms] OR ("gastrointestinal"[All Fields] AND "stromal"[All Fields] AND "tumors"[All Fields]) OR "gastrointestinal stromal tumors"[All Fields] OR ("gastrointestinal"[All Fields] AND "stromal"[All Fields] AND "tumor"[All Fields]) OR "gastrointestinal stromal tumor"[All Fields] OR ("gastrointestinal stromal tumors"[MeSH Terms] OR ("gastrointestinal"[All Fields] AND "stromal"[All Fields] AND "tumors"[All Fields]) OR "gastrointestinal stromal tumors"[All Fields]) OR (("gastrics"[All Fields] OR "stomach"[MeSH Terms] OR "stomach"[All Fields] OR "gastric"[All Fields]) AND ("mesenchym"[All Fields] OR "mesenchymal"[All Fields] OR "mesenchymalized"[All Fields] OR "mesenchymally"[All Fields] OR "mesenchymals"[All Fields] OR "mesenchymes"[All Fields] OR "mesoderm"[MeSH Terms] OR "mesoderm"[All Fields] OR "mesenchyme"[All Fields]) AND ("cysts"[MeSH Terms] OR "cysts"[All Fields] OR "cyst"[All Fields] OR "neurofibroma"[MeSH Terms] OR "neurofibroma"[All Fields] OR "neurofibromas"[All Fields] OR "tumor s"[All Fields] OR "tumoral"[All Fields] OR "tumorous"[All Fields] OR "tumour"[All Fields] OR "neoplasms"[MeSH Terms] OR "neoplasms"[All Fields] OR "tumor"[All Fields] OR "tumour s"[All Fields] OR "tumoural"[All Fields] OR "tumourous"[All Fields] OR "tumours"[All Fields] OR "tumors"[All Fields])) OR ("mesothelioma"[MeSH Terms] OR "mesothelioma"[All Fields] OR "mesotheliomas"[All Fields] OR "mesothelioma, malignant"[MeSH Terms] OR ("mesothelioma"[All Fields] AND "malignant"[All Fields]) OR "malignant mesothelioma"[All Fields]) OR (("gastrointestinal"[All Fields] OR "gastrointestinally"[All Fields] OR "gastrointestine"[All Fields]) AND ("mesenchym"[All Fields] OR "mesenchymal"[All Fields] OR "mesenchymalized"[All Fields] OR "mesenchymally"[All Fields] OR "mesenchymals"[All Fields] OR "mesenchymes"[All Fields] OR "mesoderm"[MeSH Terms] OR "mesoderm"[All Fields] OR "mesenchyme"[All Fields]) AND ("cysts"[MeSH Terms] OR "cysts"[All Fields] OR "cyst"[All Fields] OR "neurofibroma"[MeSH Terms] OR "neurofibroma"[All Fields] OR "neurofibromas"[All Fields] OR "tumor s"[All Fields] OR "tumoral"[All Fields] OR "tumorous"[All Fields] OR "tumour"[All Fields] OR "neoplasms"[MeSH Terms] OR "neoplasms"[All Fields] OR "tumor"[All Fields] OR "tumour s"[All Fields] OR "tumoural"[All Fields] OR "tumourous"[All Fields] OR "tumours"[All Fields] OR "tumors"[All Fields]) AND ("tissue s"[All Fields] OR "tissues"[MeSH Terms] OR "tissues"[All Fields] OR "tissue"[All Fields])) OR (("gastrointestinal tract"[MeSH Terms] OR ("gastrointestinal"[All Fields] AND "tract"[All Fields]) OR "gastrointestinal tract"[All Fields]) AND ("mesenchym"[All Fields] OR "mesenchymal"[All Fields] OR "mesenchymalized"[All Fields] OR "mesenchymally"[All Fields] OR "mesenchymals"[All Fields] OR "mesenchymes"[All Fields] OR "mesoderm"[MeSH Terms] OR "mesoderm"[All Fields] OR "mesenchyme"[All Fields]) AND ("cysts"[MeSH Terms] OR "cysts"[All Fields] OR "cyst"[All Fields] OR "neurofibroma"[MeSH Terms] OR "neurofibroma"[All Fields] OR "neurofibromas"[All Fields] OR "tumor s"[All Fields] OR "tumoral"[All Fields] OR "tumorous"[All Fields] OR "tumour"[All Fields] OR "neoplasms"[MeSH Terms] OR "neoplasms"[All Fields] OR "tumor"[All Fields] OR "tumour s"[All Fields] OR "tumoural"[All Fields] OR "tumourous"[All Fields] OR "tumours"[All Fields] OR "tumors"[All Fields])) OR ("gastrointestinal stromal tumors"[MeSH Terms] OR ("gastrointestinal"[All Fields] AND "stromal"[All Fields] AND "tumors"[All Fields]) OR "gastrointestinal stromal tumors"[All Fields] OR ("gastrointestinal"[All Fields] AND "stromal"[All Fields] AND "sarcoma"[All Fields]) OR "gastrointestinal stromal sarcoma"[All Fields]) OR ("gastrointestinal stromal tumors"[MeSH Terms] OR ("gastrointestinal"[All Fields] AND "stromal"[All Fields] AND "tumors"[All Fields]) OR "gastrointestinal stromal tumors"[All Fields] OR ("gastrointestinal"[All Fields] AND "stromal"[All Fields] AND "neoplasm"[All Fields]) OR "gastrointestinal stromal neoplasm"[All Fields]) OR ("gastrointestinal stromal tumors"[MeSH Terms] OR ("gastrointestinal"[All Fields] AND "stromal"[All Fields] AND "tumors"[All Fields]) OR "gastrointestinal stromal tumors"[All Fields] OR ("gastrointestinal"[All Fields] AND "stromal"[All Fields] AND "neoplasms"[All Fields]) OR "gastrointestinal stromal neoplasms"[All Fields]) OR (("gastrointestinal"[All Fields] OR "gastrointestinally"[All Fields] OR "gastrointestine"[All Fields]) AND ("leydig cell tumor"[MeSH Terms] OR ("leydig"[All Fields] AND "cell"[All Fields] AND "tumor"[All Fields]) OR "leydig cell tumor"[All Fields] OR ("interstitial"[All Fields] AND "cell"[All Fields] AND "neoplasm"[All Fields]) OR "interstitial cell neoplasm"[All Fields])) OR (("gastrointestinal"[All Fields] OR "gastrointestinally"[All Fields] OR "gastrointestine"[All Fields]) AND ("interstitial cell tumour"[All Fields] OR "leydig cell tumor"[MeSH Terms] OR ("leydig"[All Fields] AND "cell"[All Fields] AND "tumor"[All Fields]) OR "leydig cell tumor"[All Fields] OR ("interstitial"[All Fields] AND "cell"[All Fields] AND "tumor"[All Fields]) OR "interstitial cell tumor"[All Fields])) | 40049 |
| #2: "high"[All Fields] AND ("malign"[All Fields] OR "malignance"[All Fields] OR "malignances"[All Fields] OR "malignant"[All Fields] OR "malignants"[All Fields] OR "malignities"[All Fields] OR "malignity"[All Fields] OR "malignization"[All Fields] OR "malignized"[All Fields] OR "maligns"[All Fields] OR "neoplasms"[MeSH Terms] OR "neoplasms"[All Fields] OR "malignancies"[All Fields] OR "malignancy"[All Fields]) AND ("potential"[All Fields] OR "potential s"[All Fields] OR "potentialities"[All Fields] OR "potentiality"[All Fields] OR "potentially"[All Fields] OR "potentials"[All Fields] OR "potentiate"[All Fields] OR "potentiated"[All Fields] OR "potentiates"[All Fields] OR "potentiating"[All Fields] OR "potentiation"[All Fields] OR "potentiations"[All Fields] OR "potentiative"[All Fields] OR "potentiator"[All Fields] OR "potentiators"[All Fields])) OR ("high"[All Fields] AND ("malign"[All Fields] OR "malignance"[All Fields] OR "malignances"[All Fields] OR "malignant"[All Fields] OR "malignants"[All Fields] OR "malignities"[All Fields] OR "malignity"[All Fields] OR "malignization"[All Fields] OR "malignized"[All Fields] OR "maligns"[All Fields] OR "neoplasms"[MeSH Terms] OR "neoplasms"[All Fields] OR "malignancies"[All Fields] OR "malignancy"[All Fields]) AND ("potential"[All Fields] OR "potential s"[All Fields] OR "potentialities"[All Fields] OR "potentiality"[All Fields] OR "potentially"[All Fields] OR "potentials"[All Fields] OR "potentiate"[All Fields] OR "potentiated"[All Fields] OR "potentiates"[All Fields] OR "potentiating"[All Fields] OR "potentiation"[All Fields] OR "potentiations"[All Fields] OR "potentiative"[All Fields] OR "potentiator"[All Fields] OR "potentiators"[All Fields])) OR ("high"[All Fields] AND ("carcinogen s"[All Fields] OR "carcinogenes"[All Fields] OR "carcinogenic"[All Fields] OR "carcinogenically"[All Fields] OR "carcinogenicities"[All Fields] OR "carcinogenicity"[All Fields] OR "carcinogenity"[All Fields] OR "carcinogenous"[All Fields] OR "carcinogens"[Pharmacological Action] OR "carcinogens"[MeSH Terms] OR "carcinogens"[All Fields] OR "carcinogen"[All Fields]) AND ("potential"[All Fields] OR "potential s"[All Fields] OR "potentialities"[All Fields] OR "potentiality"[All Fields] OR "potentially"[All Fields] OR "potentials"[All Fields] OR "potentiate"[All Fields] OR "potentiated"[All Fields] OR "potentiates"[All Fields] OR "potentiating"[All Fields] OR "potentiation"[All Fields] OR "potentiations"[All Fields] OR "potentiative"[All Fields] OR "potentiator"[All Fields] OR "potentiators"[All Fields])) OR ("high"[All Fields] AND ("degenerative"[All Fields] OR "degeneratively"[All Fields] OR "degeneratives"[All Fields]) AND ("potential"[All Fields] OR "potential s"[All Fields] OR "potentialities"[All Fields] OR "potentiality"[All Fields] OR "potentially"[All Fields] OR "potentials"[All Fields] OR "potentiate"[All Fields] OR "potentiated"[All Fields] OR "potentiates"[All Fields] OR "potentiating"[All Fields] OR "potentiation"[All Fields] OR "potentiations"[All Fields] OR "potentiative"[All Fields] OR "potentiator"[All Fields] OR "potentiators"[All Fields])) OR ("high"[All Fields] AND ("malign"[All Fields] OR "malignance"[All Fields] OR "malignances"[All Fields] OR "malignant"[All Fields] OR "malignants"[All Fields] OR "malignities"[All Fields] OR "malignity"[All Fields] OR "malignization"[All Fields] OR "malignized"[All Fields] OR "maligns"[All Fields] OR "neoplasms"[MeSH Terms] OR "neoplasms"[All Fields] OR "malignancies"[All Fields] OR "malignancy"[All Fields]) AND ("disease progression"[MeSH Terms] OR ("disease"[All Fields] AND "progression"[All Fields]) OR "disease progression"[All Fields] OR "progression"[All Fields] OR "progress"[All Fields] OR "progressed"[All Fields] OR "progresses"[All Fields] OR "progressing"[All Fields] OR "progressions"[All Fields] OR "progressive"[All Fields] OR "progressively"[All Fields] OR "progressives"[All Fields]) AND ("potential"[All Fields] OR "potential s"[All Fields] OR "potentialities"[All Fields] OR "potentiality"[All Fields] OR "potentially"[All Fields] OR "potentials"[All Fields] OR "potentiate"[All Fields] OR "potentiated"[All Fields] OR "potentiates"[All Fields] OR "potentiating"[All Fields] OR "potentiation"[All Fields] OR "potentiations"[All Fields] OR "potentiative"[All Fields] OR "potentiator"[All Fields] OR "potentiators"[All Fields])) OR ("high"[All Fields] AND ("malign"[All Fields] OR "malignance"[All Fields] OR "malignances"[All Fields] OR "malignant"[All Fields] OR "malignants"[All Fields] OR "malignities"[All Fields] OR "malignity"[All Fields] OR "malignization"[All Fields] OR "malignized"[All Fields] OR "maligns"[All Fields] OR "neoplasms"[MeSH Terms] OR "neoplasms"[All Fields] OR "malignancies"[All Fields] OR "malignancy"[All Fields]) AND ("transform"[All Fields] OR "transformability"[All Fields] OR "transformable"[All Fields] OR "transformant"[All Fields] OR "transformants"[All Fields] OR "transformation"[All Fields] OR "transformations"[All Fields] OR "transformed"[All Fields] OR "transforms"[All Fields]) AND ("potential"[All Fields] OR "potential s"[All Fields] OR "potentialities"[All Fields] OR "potentiality"[All Fields] OR "potentially"[All Fields] OR "potentials"[All Fields] OR "potentiate"[All Fields] OR "potentiated"[All Fields] OR "potentiates"[All Fields] OR "potentiating"[All Fields] OR "potentiation"[All Fields] OR "potentiations"[All Fields] OR "potentiative"[All Fields] OR "potentiator"[All Fields] OR "potentiators"[All Fields])) OR ("high"[All Fields] AND ("malign"[All Fields] OR "malignance"[All Fields] OR "malignances"[All Fields] OR "malignant"[All Fields] OR "malignants"[All Fields] OR "malignities"[All Fields] OR "malignity"[All Fields] OR "malignization"[All Fields] OR "malignized"[All Fields] OR "maligns"[All Fields] OR "neoplasms"[MeSH Terms] OR "neoplasms"[All Fields] OR "malignancies"[All Fields] OR "malignancy"[All Fields]) AND ("biological evolution"[MeSH Terms] OR ("biological"[All Fields] AND "evolution"[All Fields]) OR "biological evolution"[All Fields] OR "evolution"[All Fields] OR "evolution s"[All Fields] OR "evolutional"[All Fields] OR "evolutions"[All Fields] OR "evolutive"[All Fields] OR "evolutivity"[All Fields]) AND ("potential"[All Fields] OR "potential s"[All Fields] OR "potentialities"[All Fields] OR "potentiality"[All Fields] OR "potentially"[All Fields] OR "potentials"[All Fields] OR "potentiate"[All Fields] OR "potentiated"[All Fields] OR "potentiates"[All Fields] OR "potentiating"[All Fields] OR "potentiation"[All Fields] OR "potentiations"[All Fields] OR "potentiative"[All Fields] OR "potentiator"[All Fields] OR "potentiators"[All Fields])) OR ("high"[All Fields] AND ("malign"[All Fields] OR "malignance"[All Fields] OR "malignances"[All Fields] OR "malignant"[All Fields] OR "malignants"[All Fields] OR "malignities"[All Fields] OR "malignity"[All Fields] OR "malignization"[All Fields] OR "malignized"[All Fields] OR "maligns"[All Fields] OR "neoplasms"[MeSH Terms] OR "neoplasms"[All Fields] OR "malignancies"[All Fields] OR "malignancy"[All Fields]) AND ("conversion"[All Fields] OR "conversions"[All Fields]) AND ("potential"[All Fields] OR "potential s"[All Fields] OR "potentialities"[All Fields] OR "potentiality"[All Fields] OR "potentially"[All Fields] OR "potentials"[All Fields] OR "potentiate"[All Fields] OR "potentiated"[All Fields] OR "potentiates"[All Fields] OR "potentiating"[All Fields] OR "potentiation"[All Fields] OR "potentiations"[All Fields] OR "potentiative"[All Fields] OR "potentiator"[All Fields] OR "potentiators"[All Fields])) OR ("high"[All Fields] AND ("malign"[All Fields] OR "malignance"[All Fields] OR "malignances"[All Fields] OR "malignant"[All Fields] OR "malignants"[All Fields] OR "malignities"[All Fields] OR "malignity"[All Fields] OR "malignization"[All Fields] OR "malignized"[All Fields] OR "maligns"[All Fields] OR "neoplasms"[MeSH Terms] OR "neoplasms"[All Fields] OR "malignancies"[All Fields] OR "malignancy"[All Fields]) AND ("lesion"[All Fields] OR "lesion s"[All Fields] OR "lesional"[All Fields] OR "lesions"[All Fields]) AND ("potential"[All Fields] OR "potential s"[All Fields] OR "potentialities"[All Fields] OR "potentiality"[All Fields] OR "potentially"[All Fields] OR "potentials"[All Fields] OR "potentiate"[All Fields] OR "potentiated"[All Fields] OR "potentiates"[All Fields] OR "potentiating"[All Fields] OR "potentiation"[All Fields] OR "potentiations"[All Fields] OR "potentiative"[All Fields] OR "potentiator"[All Fields] OR "potentiators"[All Fields])) | 160233 |
| #3: #1 AND #2 | 1612 |
| Web of Science | #1: ALL=(gastrointestinal stromal tumor OR gastrointestinal stromal tumors OR gastric mesenchymal tumor OR mesothelioma OR gastrointestinal mesenchymal tumor tissue OR gastrointestinal tract mesenchymal tumor OR gastrointestinal stromal sarcoma OR gastrointestinal stromal neoplasm OR gastrointestinal stromal neoplasms OR gastrointestinal interstitial cell neoplasm OR gastrointestinal interstitial cell tumor) | 44862 |
| #2: ALL=(high malignant potential OR high malignancy potential OR high carcinogenic potential OR high degenerative potential OR high malignant progression potential OR high malignant transformation potential OR high malignant evolution potential OR high malignant conversion potential OR high malignant lesion potential) | 53750 |
| #3: #1 AND #2 | 1151 |
| Embase | #1: 'gastrointestinal stromal tumor'/exp OR 'gastrointestinal stromal tumor' OR (gastrointestinal AND stromal AND ('tumor'/exp OR tumor)) OR 'gastrointestinal stromal tumors'/exp OR 'gastrointestinal stromal tumors' OR (gastrointestinal AND stromal AND ('tumors'/exp OR tumors)) OR 'gastric mesenchymal tumor' OR (gastric AND mesenchymal AND ('tumor'/exp OR tumor)) OR 'mesothelioma'/exp OR mesothelioma OR 'gastrointestinal mesenchymal tumor tissue' OR (gastrointestinal AND mesenchymal AND ('tumor'/exp OR tumor) AND ('tissue'/exp OR tissue)) OR 'gastrointestinal tract mesenchymal tumor' OR (gastrointestinal AND ('tract'/exp OR tract) AND mesenchymal AND ('tumor'/exp OR tumor)) OR 'gastrointestinal stromal sarcoma'/exp OR 'gastrointestinal stromal sarcoma' OR (gastrointestinal AND stromal AND ('sarcoma'/exp OR sarcoma)) OR 'gastrointestinal stromal neoplasm'/exp OR 'gastrointestinal stromal neoplasm' OR (gastrointestinal AND stromal AND ('neoplasm'/exp OR neoplasm)) OR 'gastrointestinal stromal neoplasms' OR (gastrointestinal AND stromal AND ('neoplasms'/exp OR neoplasms)) OR 'gastrointestinal interstitial cell neoplasm' OR (gastrointestinal AND interstitial AND ('cell'/exp OR cell) AND ('neoplasm'/exp OR neoplasm)) OR 'gastrointestinal interstitial cell tumor' OR (gastrointestinal AND interstitial AND ('cell'/exp OR cell) AND ('tumor'/exp OR tumor)) | 71211 |
| #2: 'high malignant potential' OR (high AND malignant AND ('potential'/exp OR potential)) OR 'high malignancy potential' OR (high AND ('malignancy'/exp OR malignancy) AND ('potential'/exp OR potential)) OR 'high carcinogenic potential' OR (high AND carcinogenic AND ('potential'/exp OR potential)) OR 'high degenerative potential' OR (high AND degenerative AND ('potential'/exp OR potential)) OR 'high malignant progression potential' OR (high AND malignant AND ('progression'/exp OR progression) AND ('potential'/exp OR potential)) OR 'high malignant transformation potential' OR (high AND malignant AND ('transformation'/exp OR transformation) AND ('potential'/exp OR potential)) OR 'high malignant evolution potential' OR (high AND malignant AND ('evolution'/exp OR evolution) AND ('potential'/exp OR potential)) OR 'high malignant conversion potential' OR (high AND malignant AND ('conversion'/exp OR conversion) AND ('potential'/exp OR potential)) OR 'high malignant lesion potential' OR (high AND malignant AND ('lesion'/exp OR lesion) AND ('potential'/exp OR potential)) | 64031 |
| #3: #1 AND #2 | 1632 |
| Cochrane | #1: “gastrointestinal stromal tumor” OR “Gastrointestinal Stromal” OR “Gastrointestinal Stromal Neoplasm” OR “Stromal Neoplasm, Gastrointestinal” OR “Gastrointestinal Stromal Tumor” OR “Tumors, Gastrointestinal Stromal” OR “Gastrointestinal Stromal Neoplasms” OR “Neoplasms, Gastrointestinal Stromal” OR “Stromal Tumors, Gastrointestinal” OR “Stromal Neoplasms, Gastrointestinal” OR “Stromal Tumor, Gastrointestinal” OR “Tumor, Gastrointestinal Stromal” OR “Gastrointestinal Stromal Sarcoma” | 1324 |
| #2: "high malignant potential" OR "high malignancy potential" OR "high carcinogenic potential" OR "high degenerative potential" OR "high malignant progression potential" OR "high malignant transformation potential" OR "high malignant evolution potential" OR "high malignant conversion potential" OR "high malignant lesion potential" | 723 |
| #3: #1 AND #2 | 56 |
| Total number |  | 4451 |
| Time | April 22, 2024 | |
| Language restriction | English | |

**Supplementary file 2: Quality evaluation criteria of included literatures**


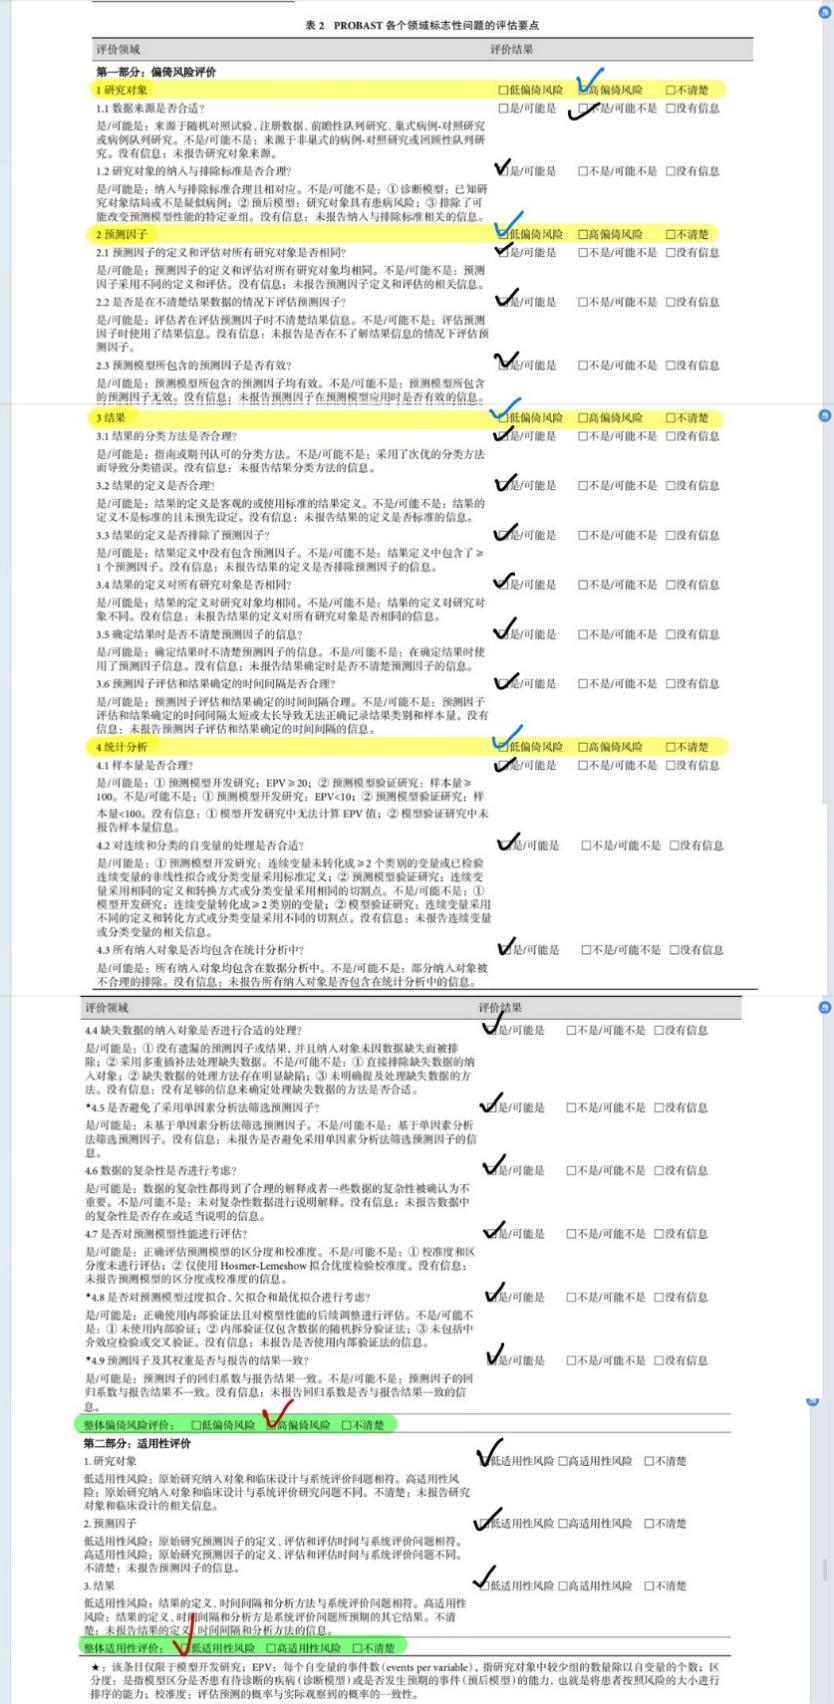


Fig. 1 Chen, T. ‘s paper quality evaluation


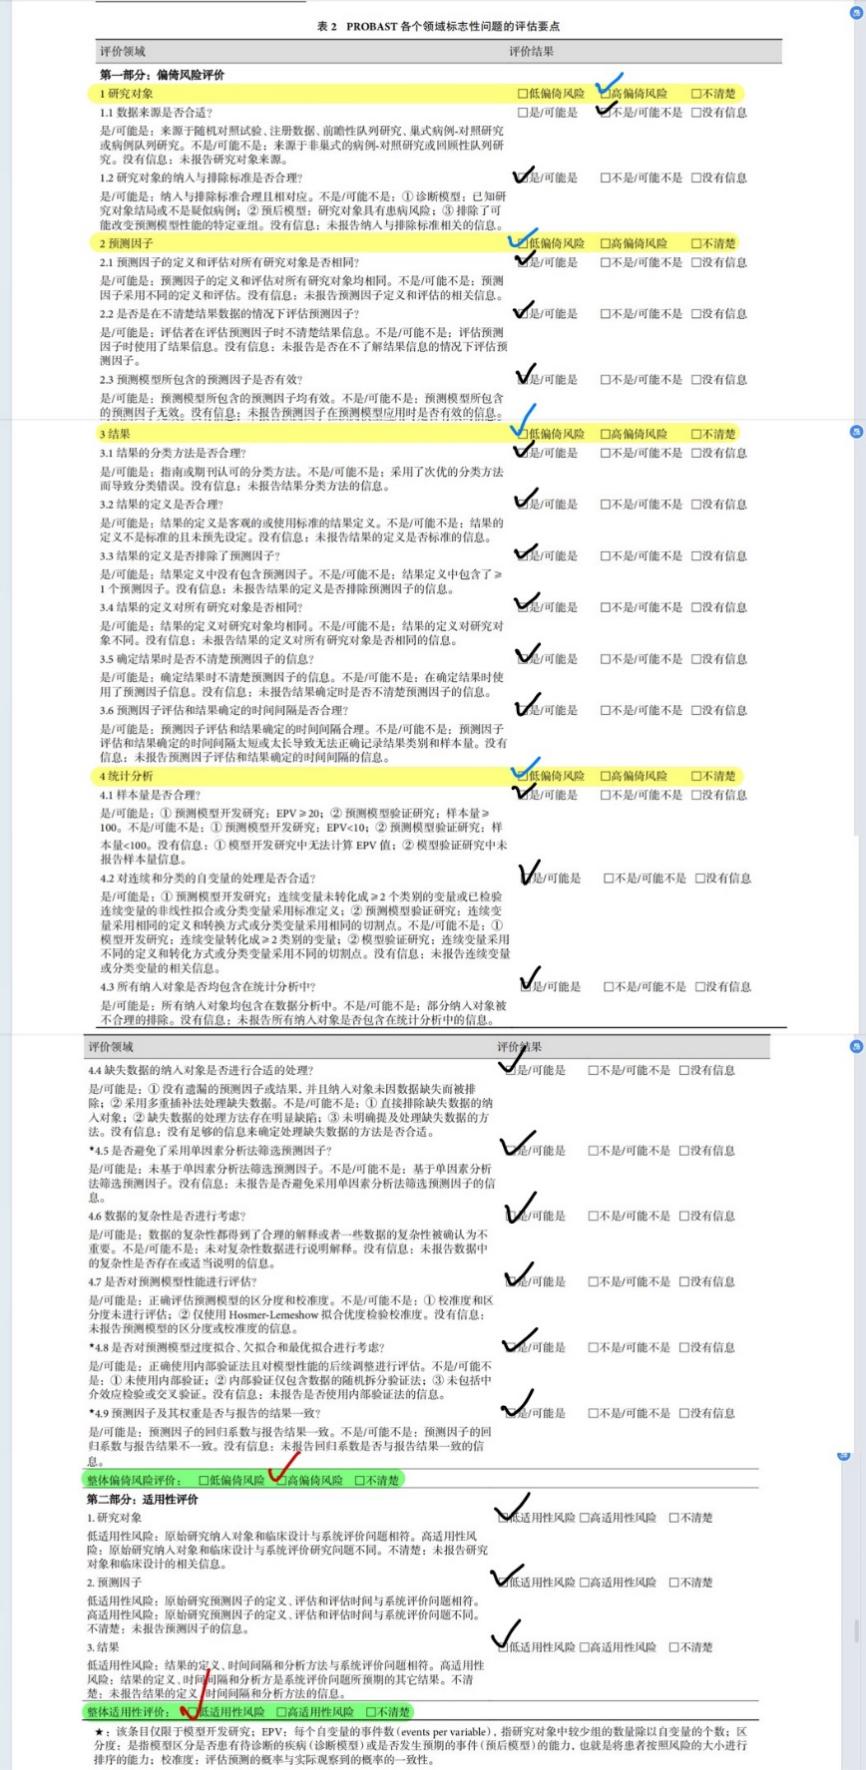


Fig. 2 Ren, C. ‘s paper quality evaluation


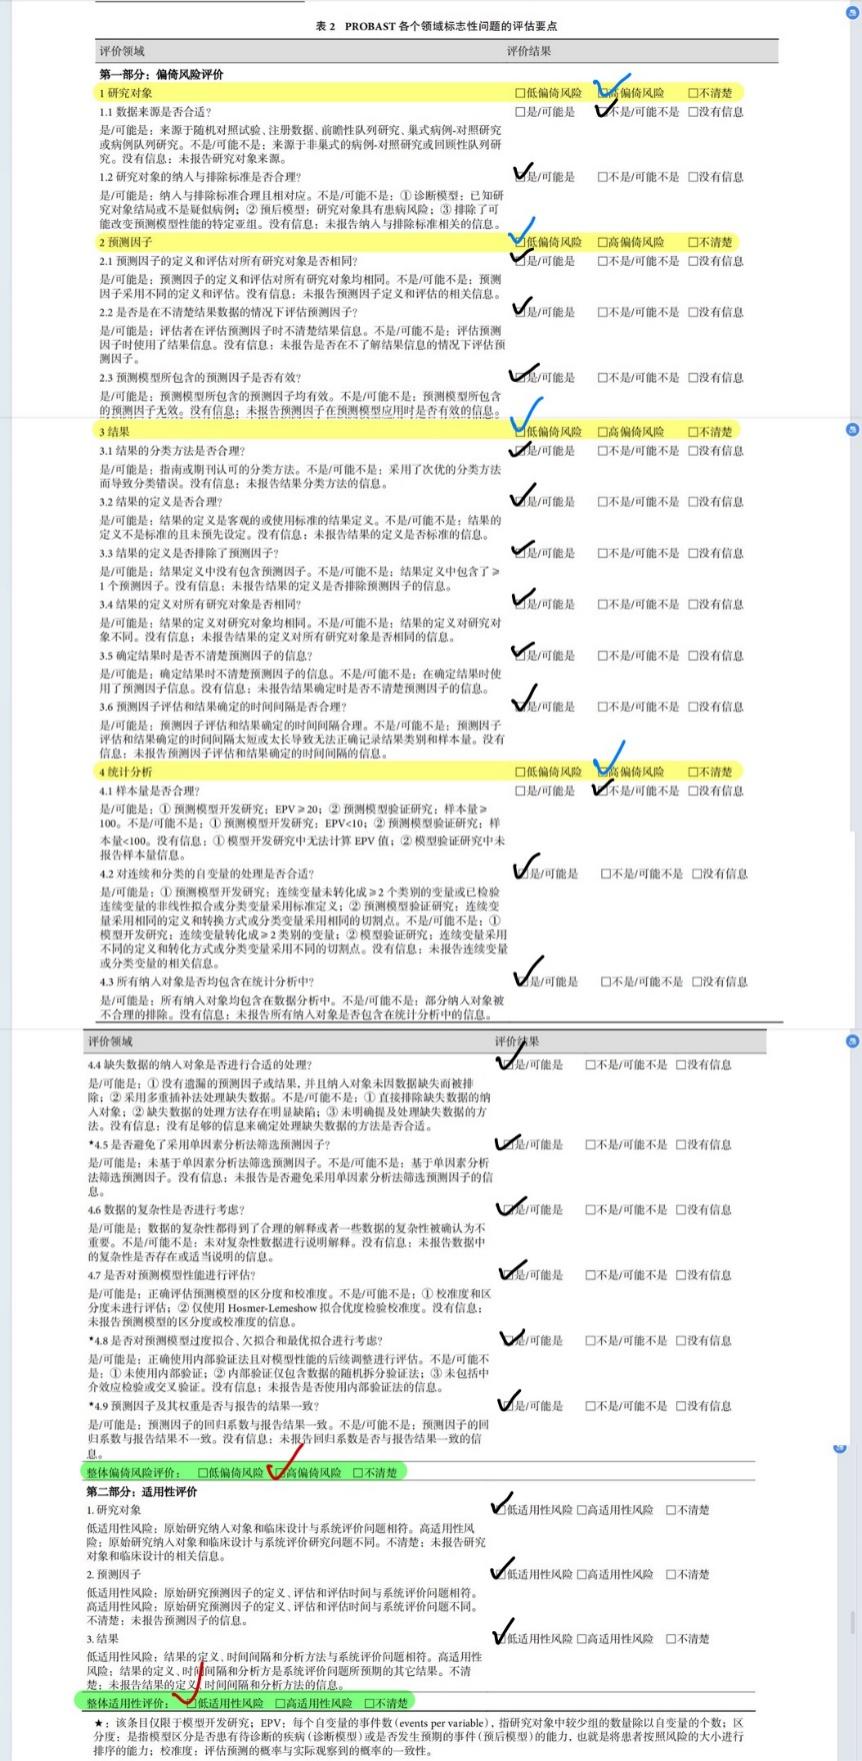


Fig. 3 Li, C. ‘s paper quality evaluation


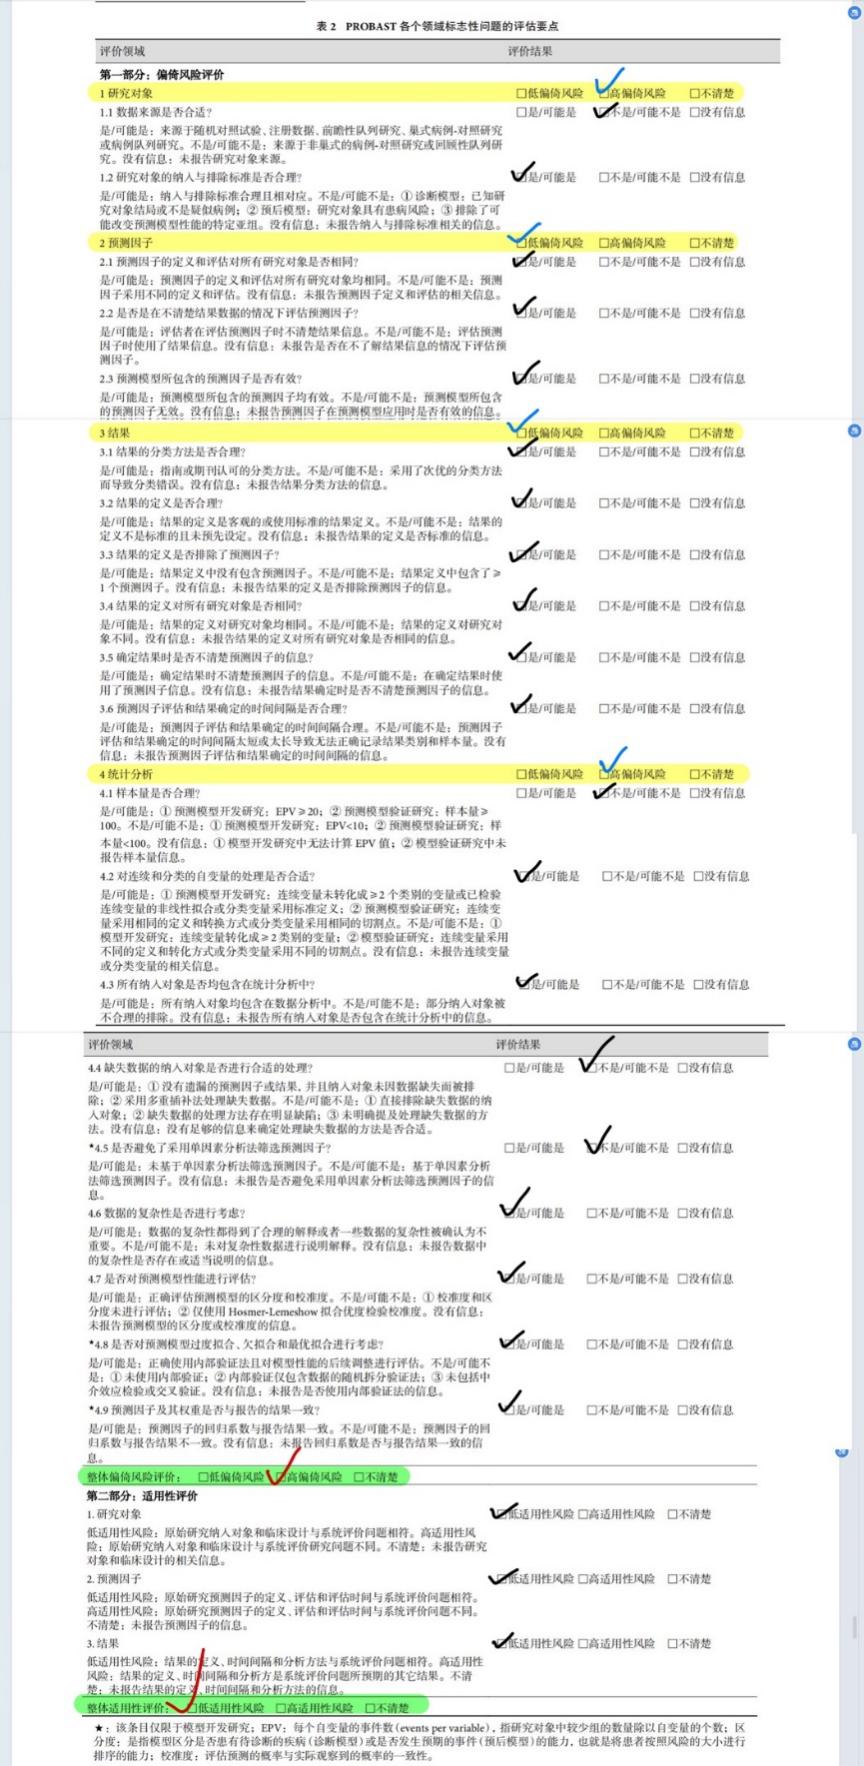


Fig. 4 Sun, X. F. ‘s paper quality evaluation


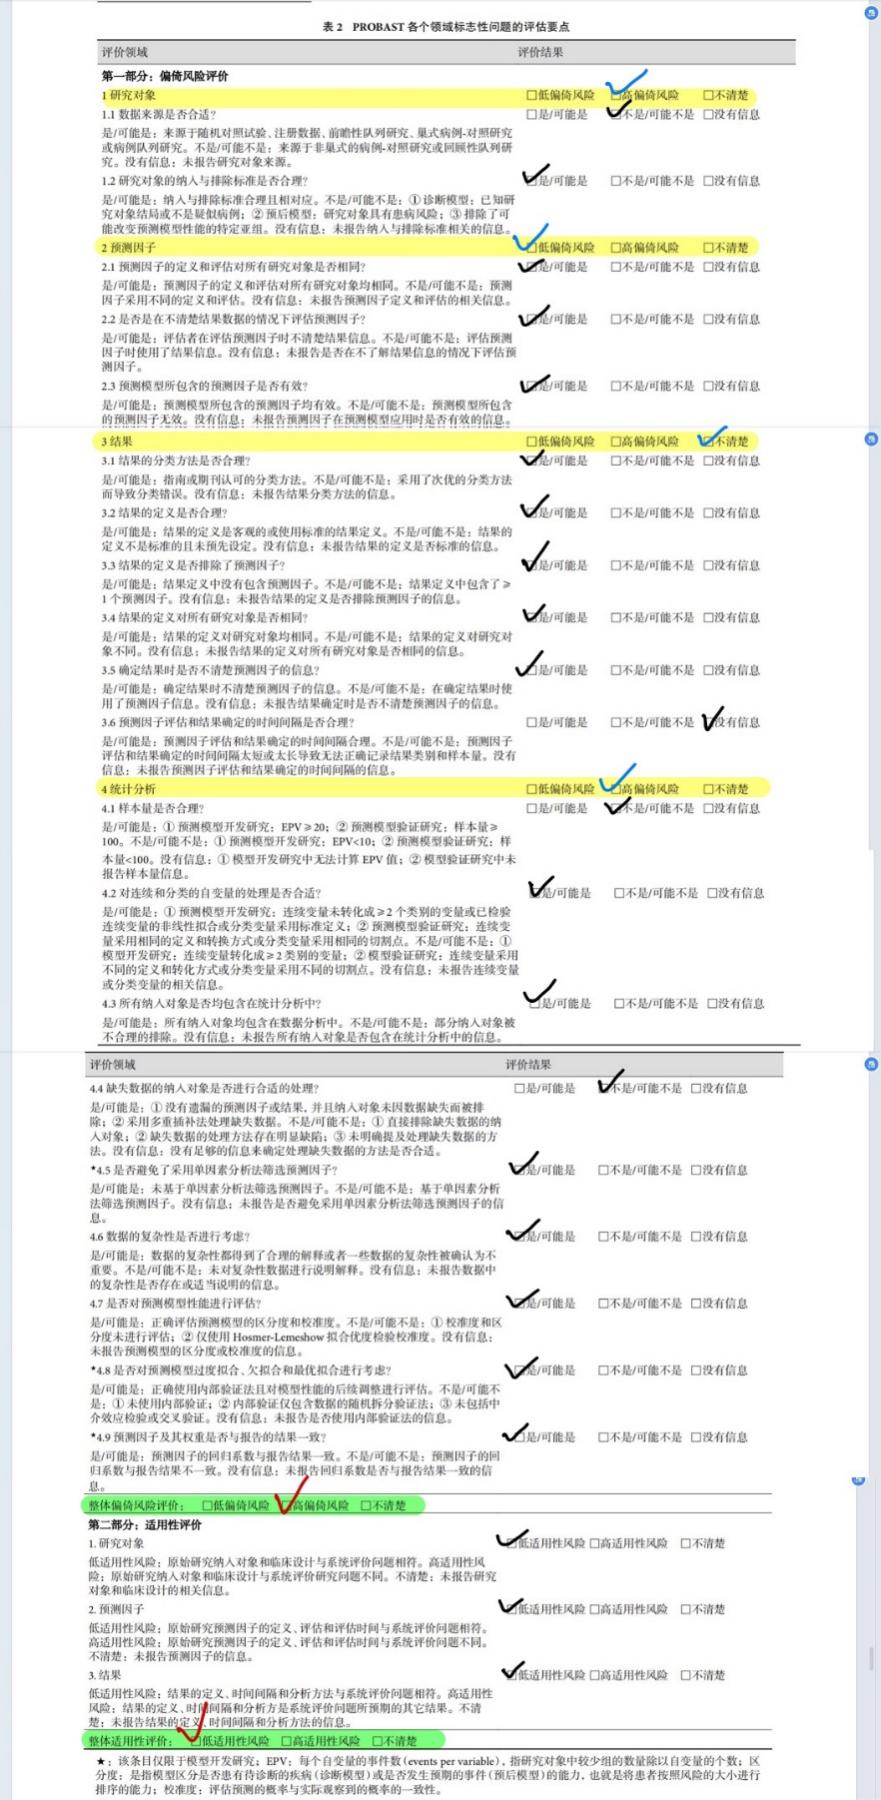


Fig. 5 Liu, L. ‘s paper quality evaluation


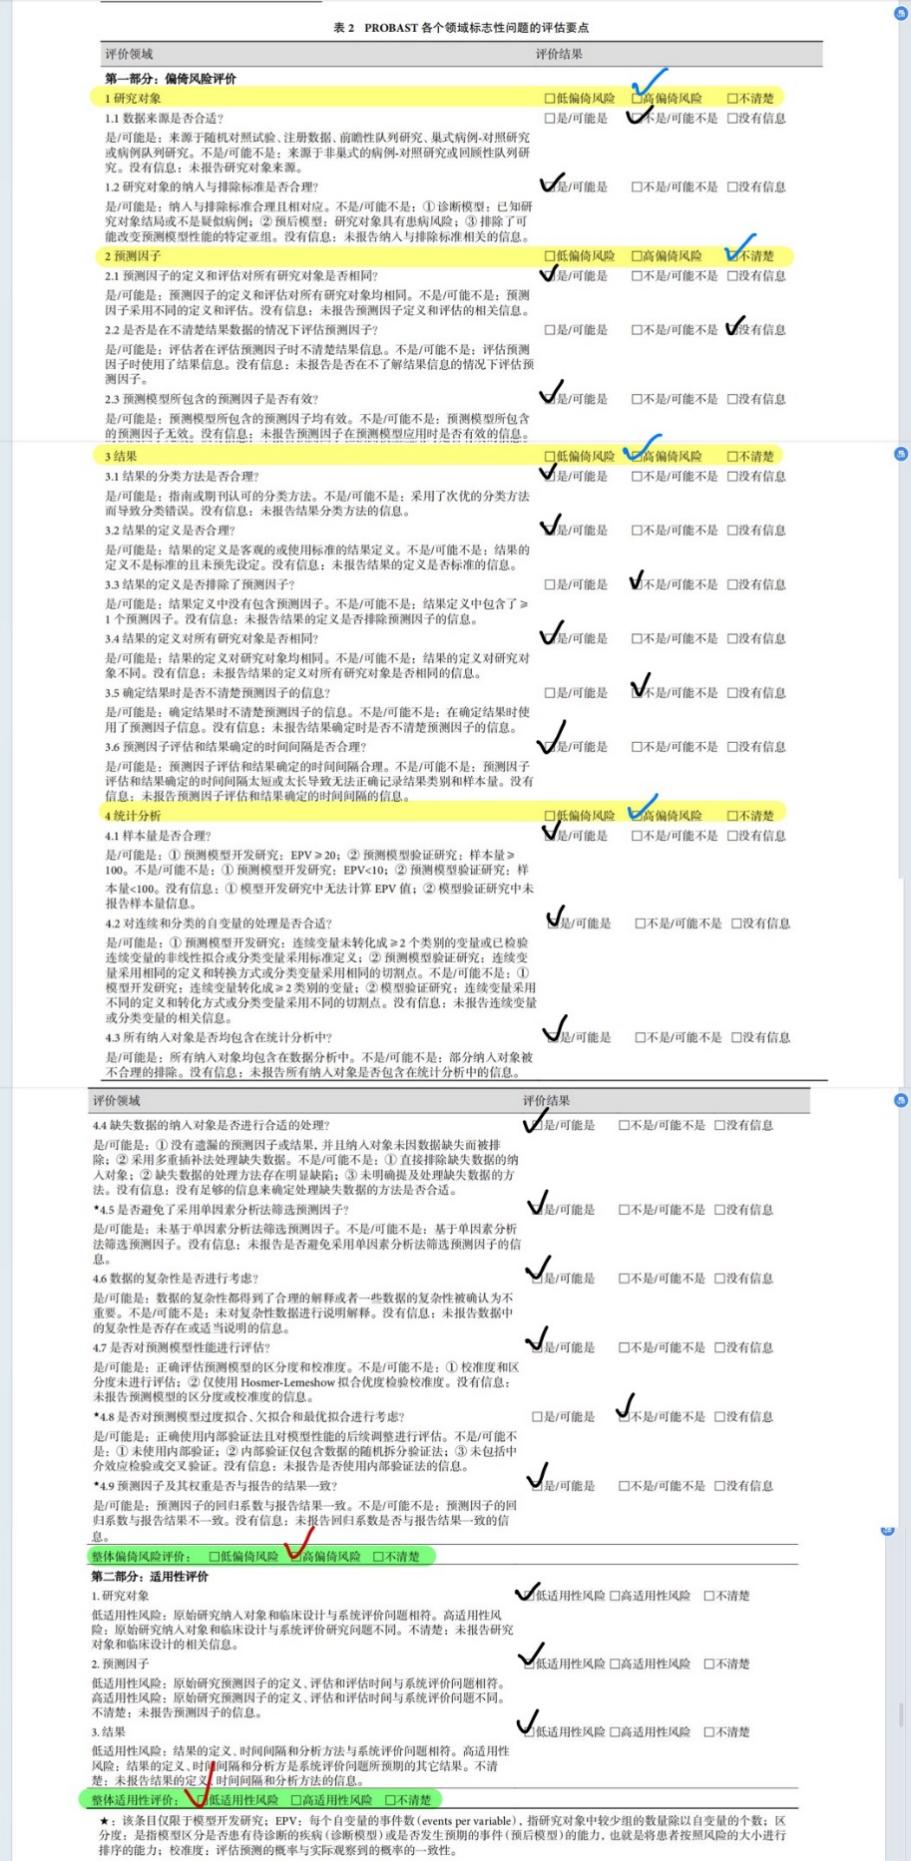


Fig. 6 Liu, Z. ‘s paper quality evaluation


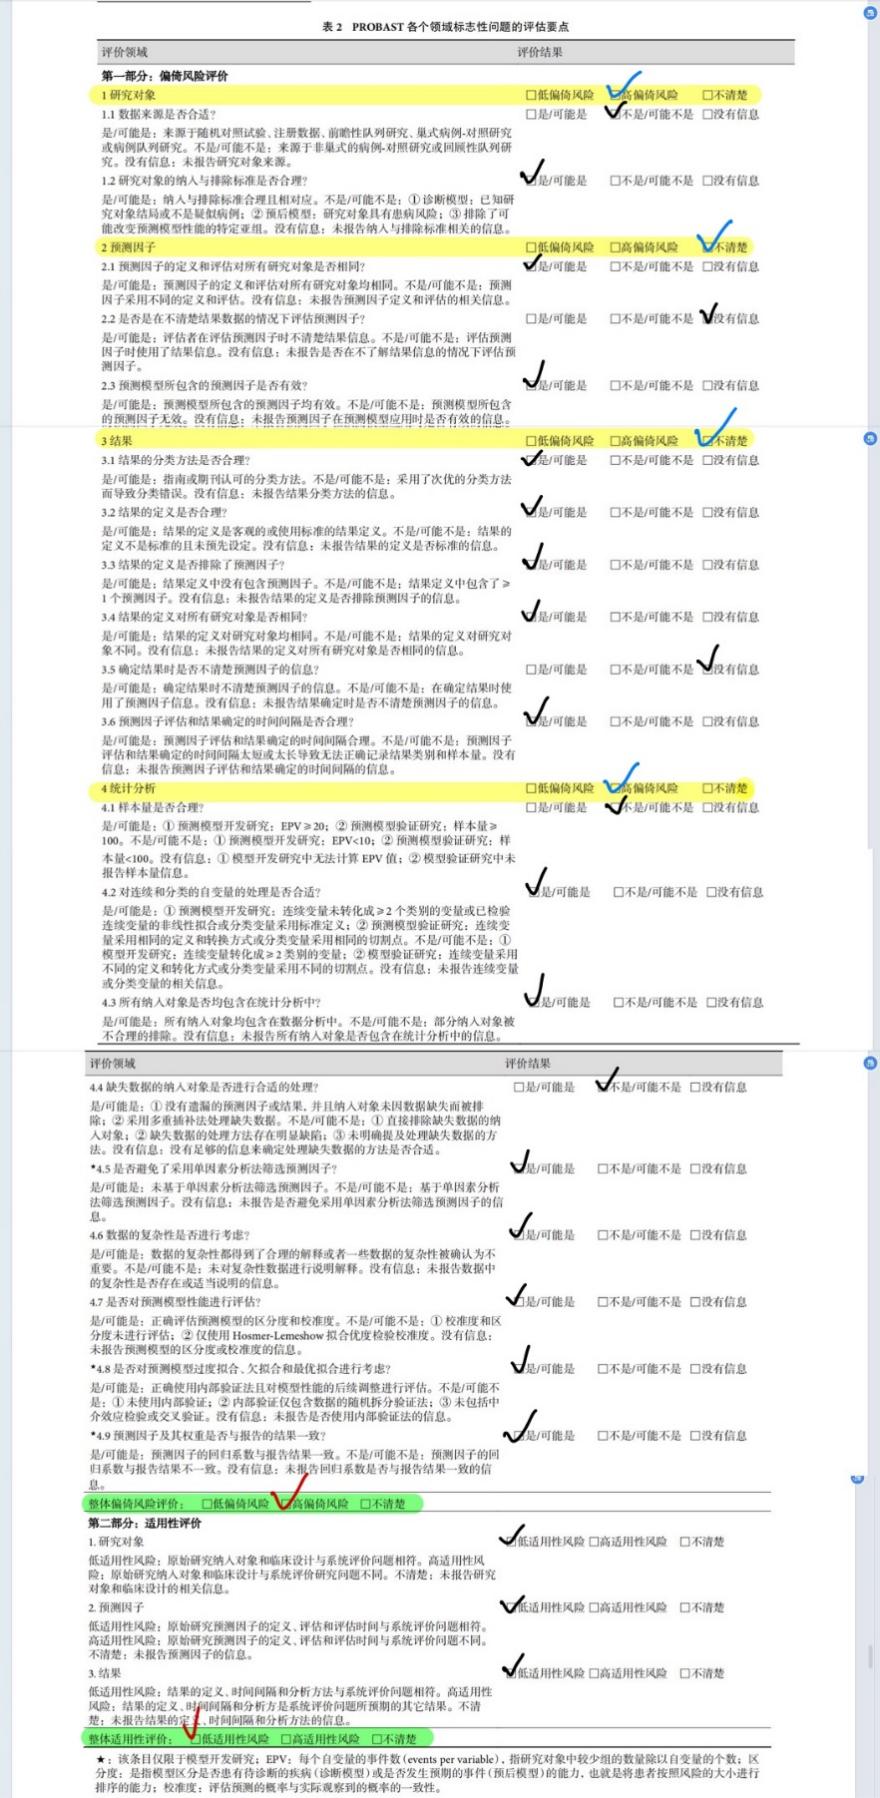


Fig. 7 Xiaoxuan Jia ‘s paper quality evaluation


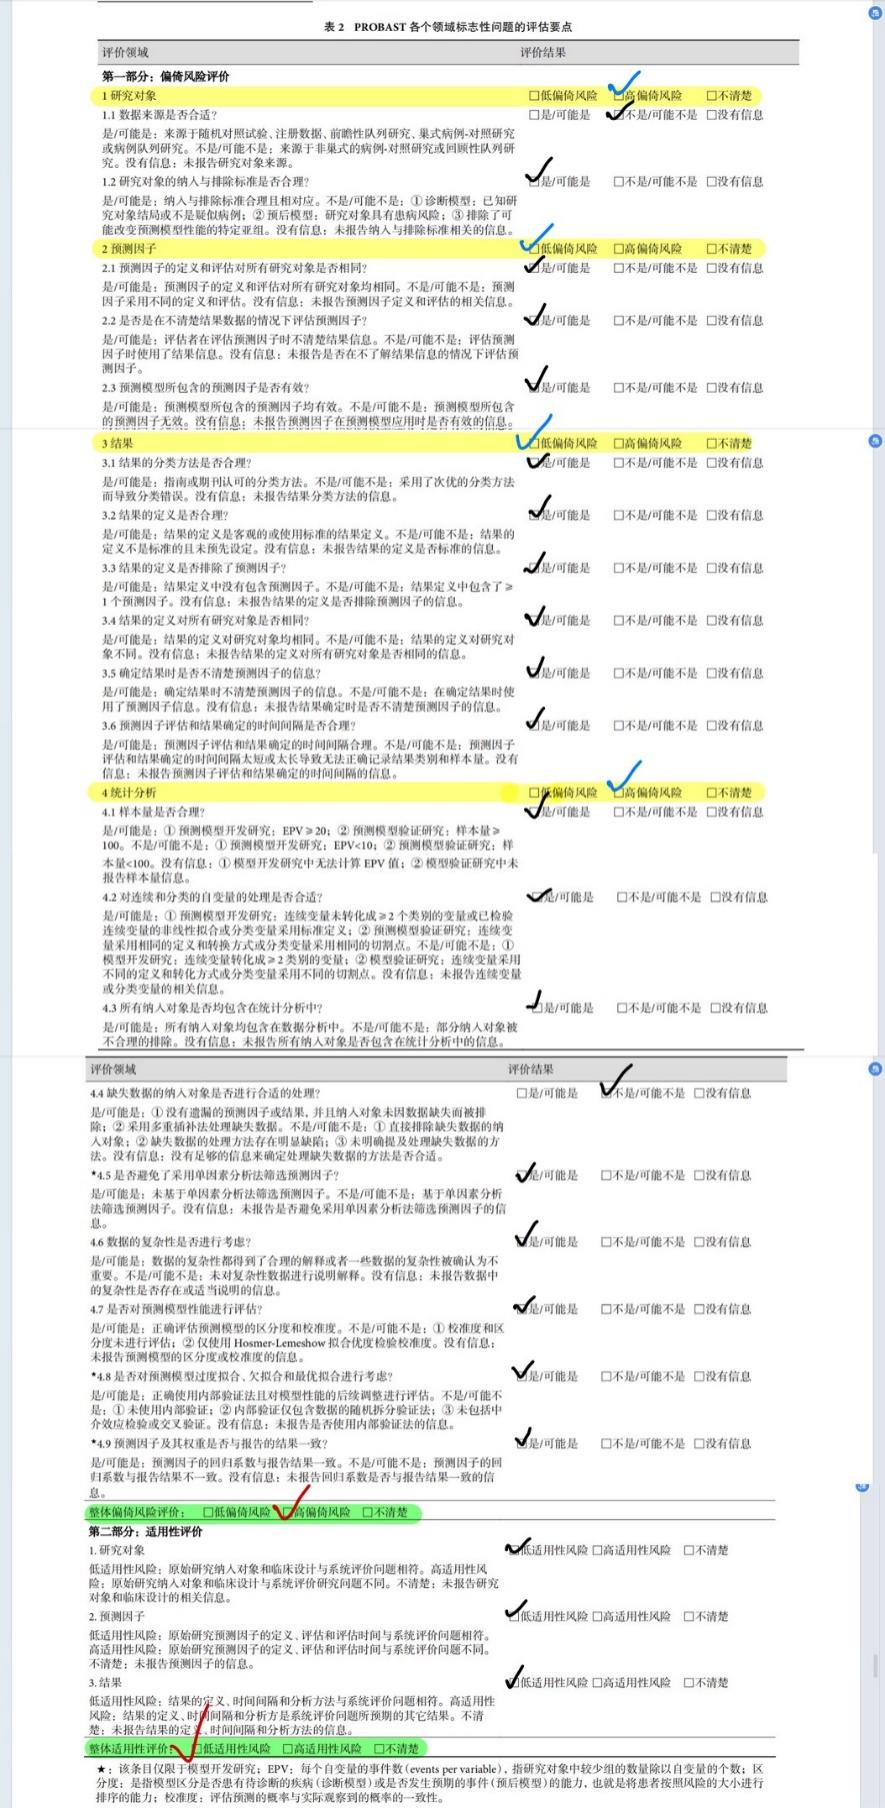


Fig. 8 Caiyue Ren ‘s paper quality evaluation


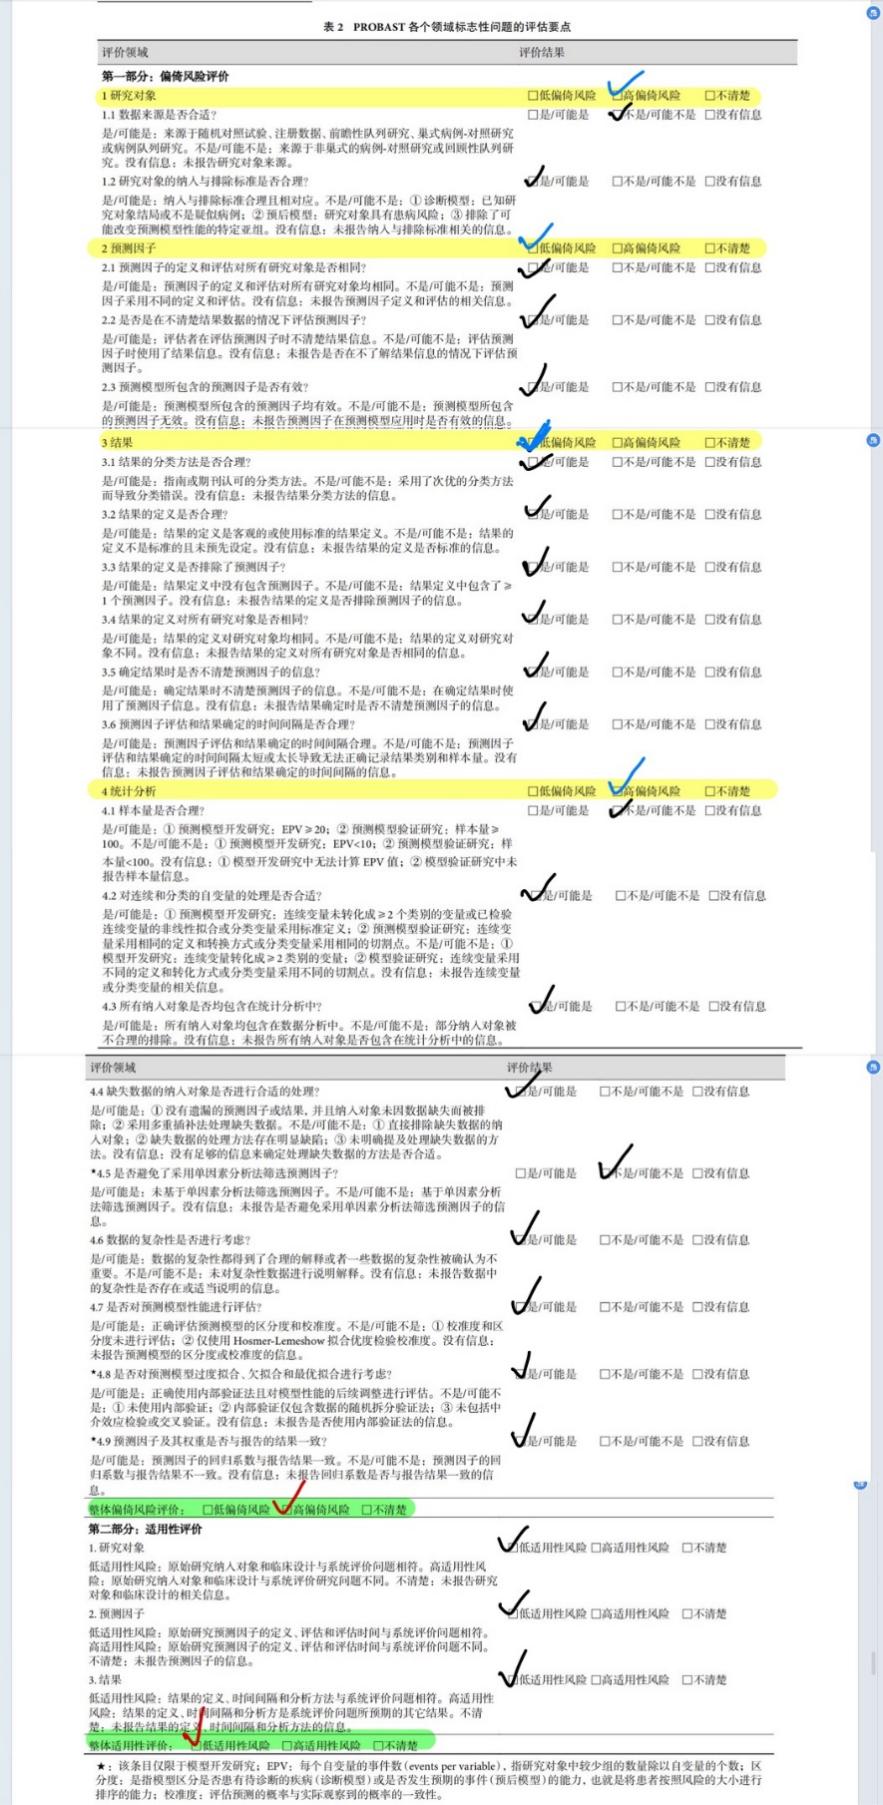


Fig. 9 Cui Zhang ‘s paper quality evaluation


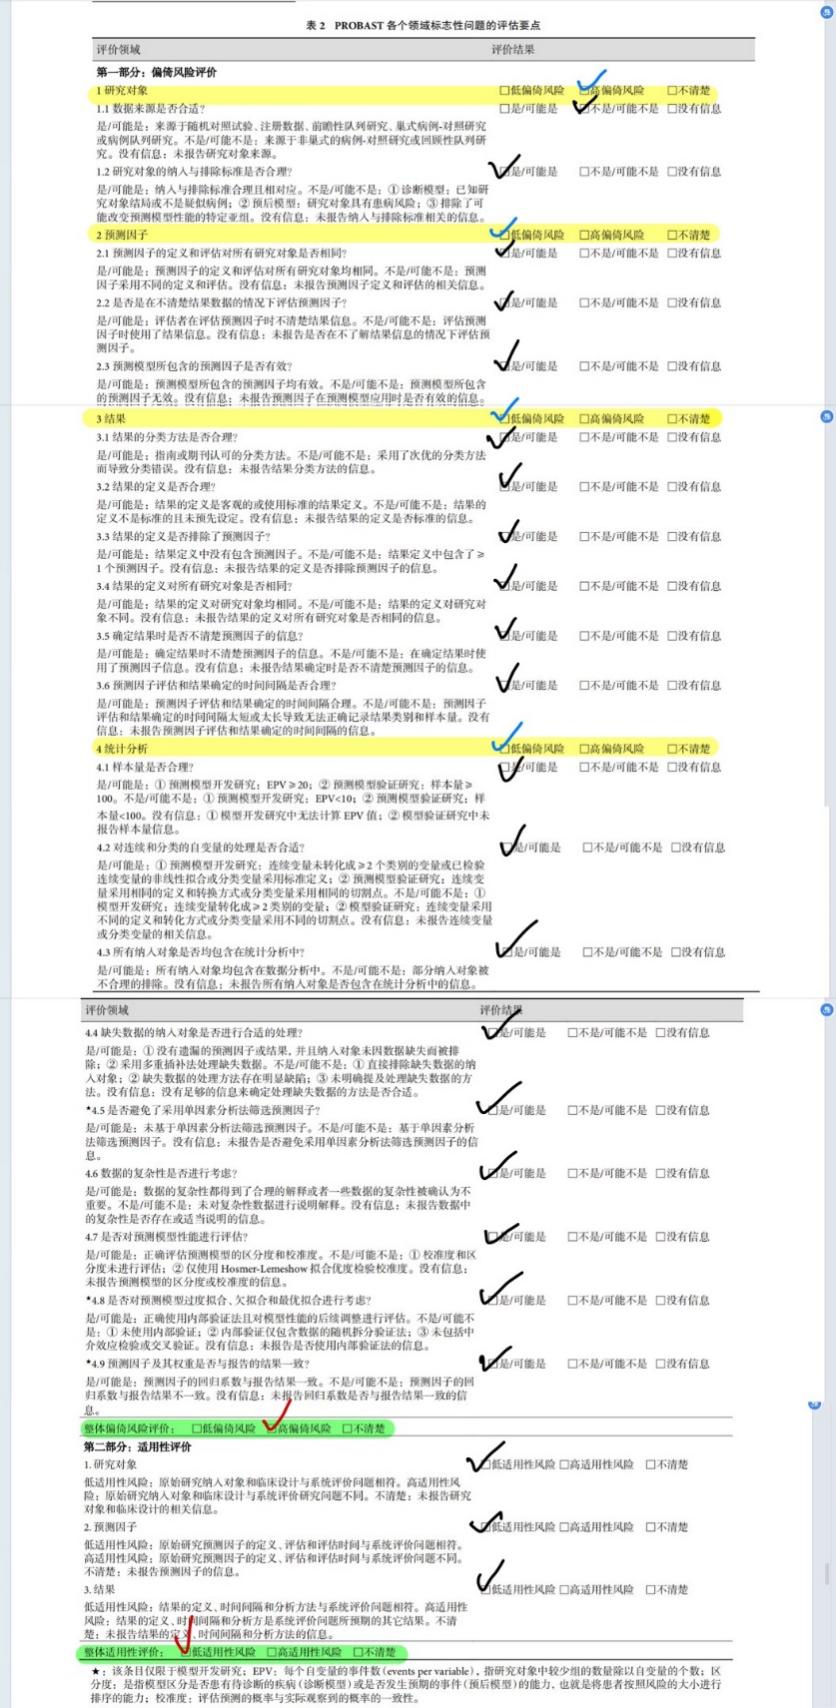


Fig. 10 Weiqun Ao ‘s paper quality evaluation


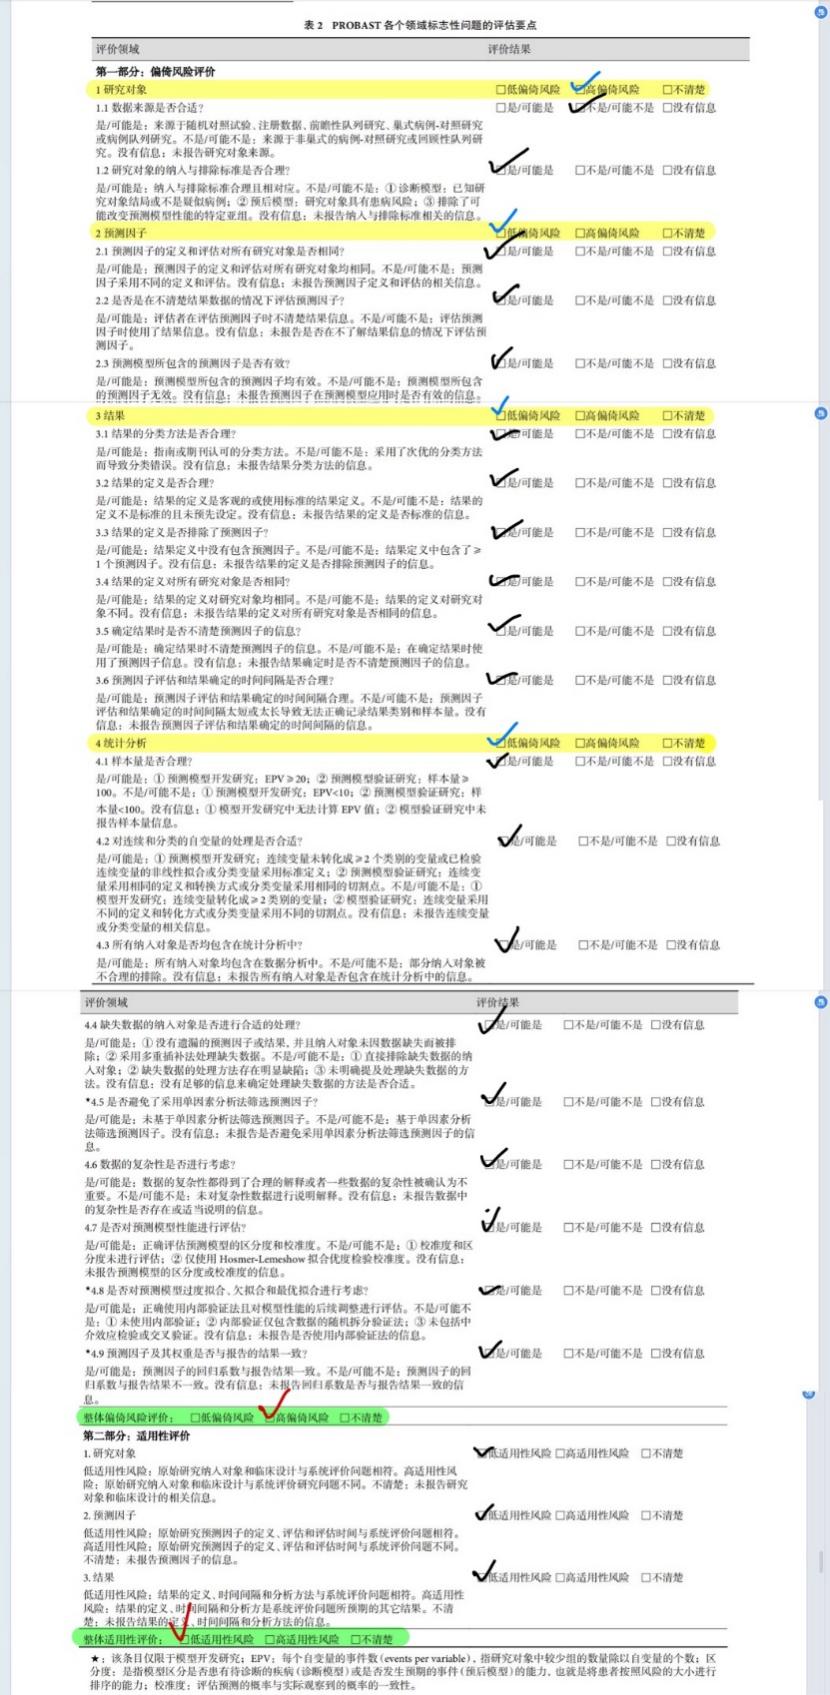


Fig. 11 Hairui Chu ‘s paper quality evaluation


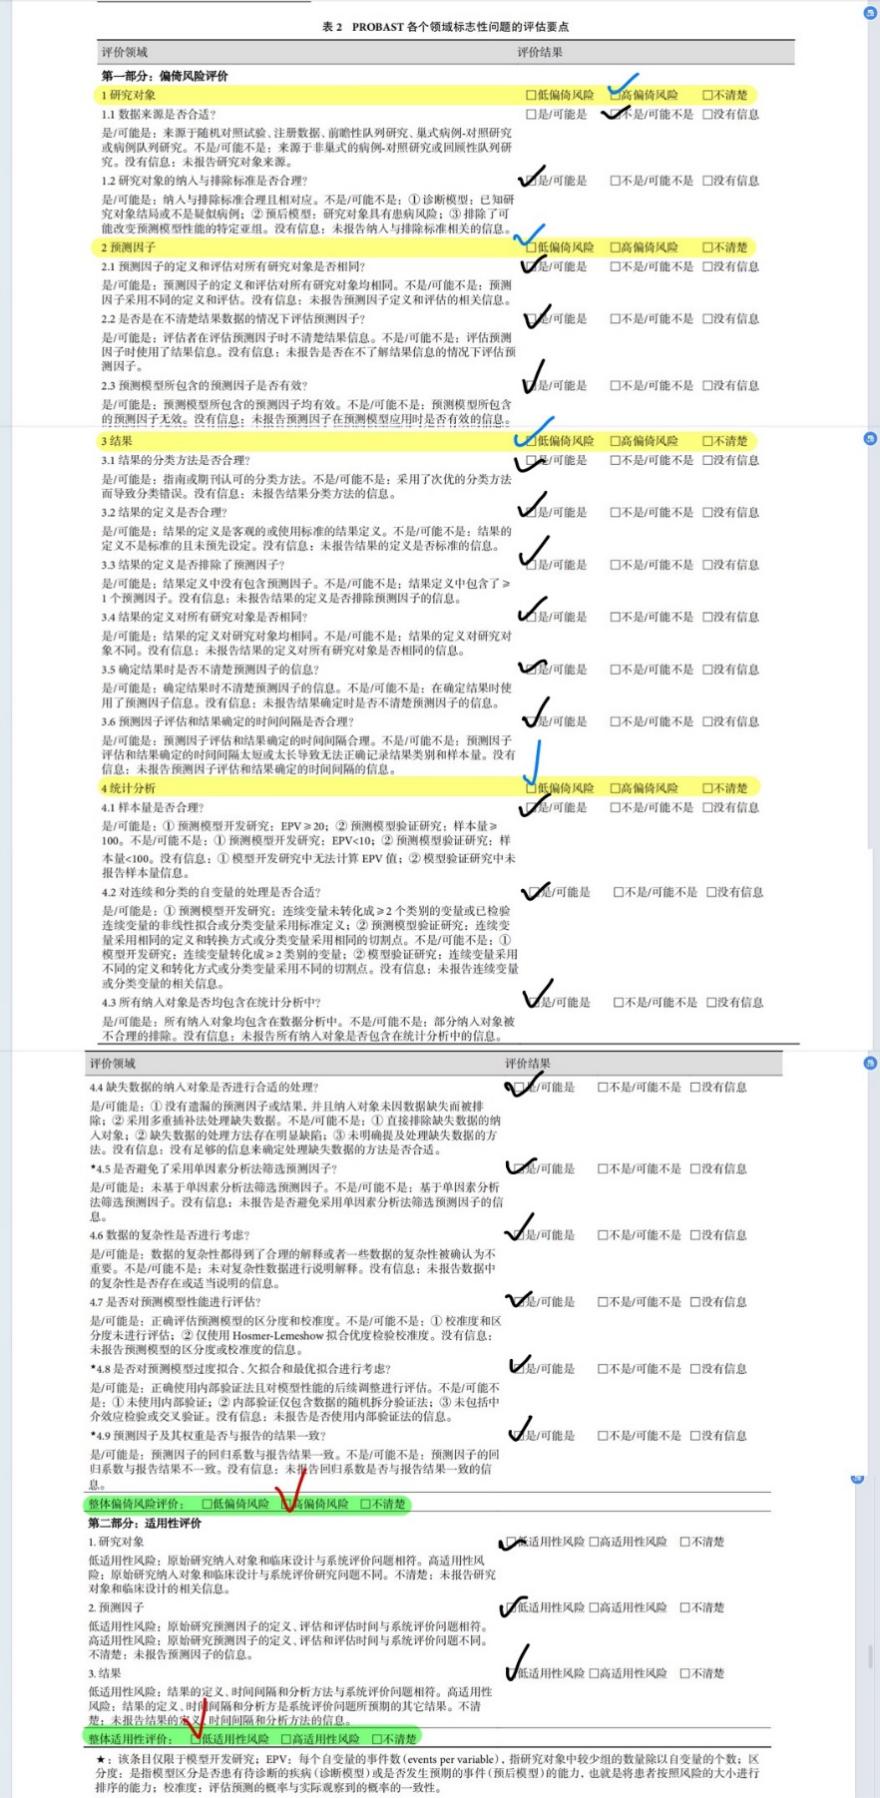


Fig. 12 Chao Wang ‘s paper quality evaluation

**Supplementary file 3: Characteristics of the included studies**

| Study | County | Study design | No.patients in the train set | No.patients in the test set | Technique used for feature selection | Types of machine learning | Data source |
| --- | --- | --- | --- | --- | --- | --- | --- |
| Chen, T.(2019) | China | Retro | 130 | 92 | Relief | SVM,LR,LR,LR | Multiple institution |
| Caiyue Ren(2019) | China | Retro | 117 | 51 | LASSO | LR,LR | Single institution |
| Chao Wang(2019) | China | Retro | 233 | 100 | stepwise backward | LR | Single institution |
| Ren, C.(2020) | China | Retro | 308 | 132 | LASSO | LR | Single institution |
| Li, C.(2021) | China | Retro | 167 | 39 | forward likelihood ratio (LR) | LR | Single institution |
| Weiqun Ao(2021) | China | Retro | 165 | 71 | LASSO | LR,LR | Single institution |
| Hairui Chu(2021) | China | Retro | 205 | 87 | LASSO | LR | Single institution |
| Sun, X. F.(2022) | China | Retro | 69 | 34 | stepwise backward | LR,XGboost,linear regression | Single institution |
| Liu, L.(2023) | China | Retro | 179 | 79 | LASSO | LR | Single institution |
| Xiaoxuan Jia(2023) | China | Retro | 74 | 37 | LASSO | QDA | Multiple institution |
| Cui Zhang(2023) | China | Retro | 161 | 148 | stepwise regression | LR,GDBT | Multiple institution |
| Liu, Z.(2024) | China | Retro | 345 | 149 | stepwise backward | LR | Single institution |

**Supplementary file 4: Risk of bias assessment of the included studies**

| Author | Year | Risk of bias | | | | Overall risk of bias rating | Overall applicability rating |
| --- | --- | --- | --- | --- | --- | --- | --- |
|  |  | Participants | Predictors | Outcome | Analysis |  |  |
| Chen, T. | 2019 | high | low | low | low | high | low |
| Ren, C. | 2020 | high | low | low | low | high | low |
| Li, C. | 2021 | high | low | low | high | high | low |
| Sun, X. F. | 2022 | high | low | low | high | high | low |
| Liu, L. | 2023 | high | low | unclear | high | high | low |
| Liu, Z. | 2024 | high | unclear | high | high | high | low |
| Xiaoxuan Jia | 2023 | high | unclear | unclear | high | high | low |
| Caiyue Ren | 2019 | high | low | low | high | high | low |
| Cui Zhang | 2023 | high | low | low | high | high | low |
| Weiqun Ao | 2021 | high | low | low | low | high | low |
| Hairui Chu | 2021 | high | low | low | low | high | low |
| Chao Wang | 2019 | high | low | low | low | high | low |
